# Supplementary material for: Low-hysteresis and highly linear sensors based on environmentally stable, adhesive, and antibacterial hydrogels
Source: Royal Society of Chemistry journal article supplement (doi:10.1039/d4ta00129j), 2024-01-01
Supplement: d4ta00129j1.pdf [file d4ta00129j1.pdf]

*Supporting information*

**Low-hysteresis and highly linear sensors  
based on environmentally stable, adhesive,  
and antibacterial hydrogels**

*Chengmeng Wei,<sup>a</sup> Yao Wang,<sup>a</sup> Yongjie Liang,<sup>a</sup> Jiaming Wu,<sup>a</sup> Feng Li,<sup>a</sup> Qiuxia Luo,<sup>a</sup> Yewei Lu,<sup>a</sup> Cuiwen Liu,<sup>a</sup> Ru Zhang,<sup>a</sup> Zhenpin Lu,<sup>b</sup> Baiping Xu,<sup>a</sup> Ning Qing,<sup>a,\*</sup> Liuyan Tang<sup>a,\*</sup>*

<sup>a</sup> School of Environmental and Chemical Engineering, Wuyi University, Jiangmen, 529020, China.

<sup>b</sup> Department of Chemistry, City University of Hong Kong, Hong Kong, 999077, China.

\*Corresponding author.

E-mails: tangly@wyu.edu.cn(wyuchemtangly@126.com) (Liuyan Tang),  
wyuchemqn@126.com (Ning Qing)

**Table S1.** The detailed formulation of PVA-PA-E/M hydrogels

| <b>EA (mol/L)</b> | <b>MPTC (mol/L)</b> | <b>EA/MPTC</b> |
|-------------------|---------------------|----------------|
| <b>0.075</b>      | <b>1.10</b>         | <b>0.1</b>     |
| <b>0.15</b>       | <b>1.05</b>         | <b>0.14</b>    |
| <b>0.2</b>        | <b>1.04</b>         | <b>0.2</b>     |
| <b>0.3</b>        | <b>1.01</b>         | <b>0.3</b>     |
| <b>0.4</b>        | <b>0.98</b>         | <b>0.4</b>     |
| <b>0.5</b>        | <b>0.95</b>         | <b>0.5</b>     |

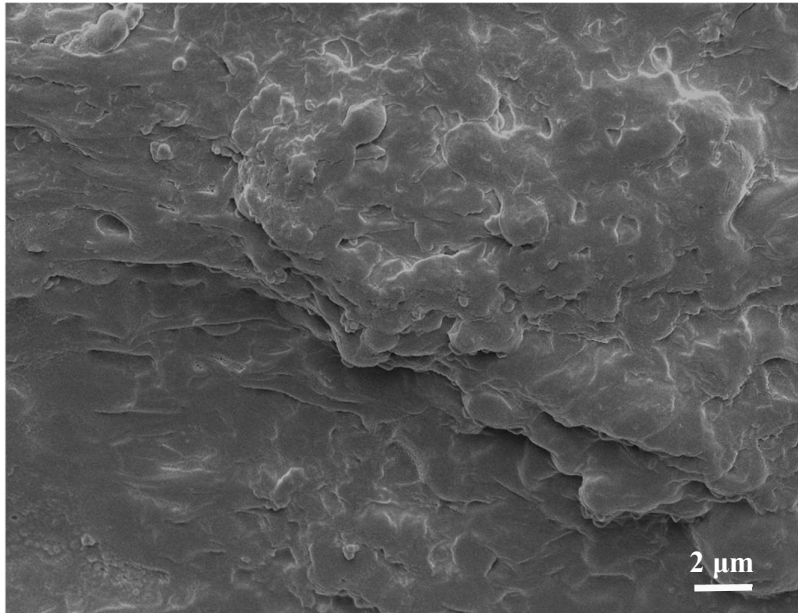

**Fig. S1.** SEM image of PVA-E/M<sub>0.4</sub> hydrogel.

### Elements proportion

| Element | C-Atomic% | N-Atomic% | O-Atomic% | P-Atomic% | Cl-Atomic% |
|---------|-----------|-----------|-----------|-----------|------------|
| Atomic  | 50.42     | 5.20      | 34.96     | 8.11      | 1.32       |

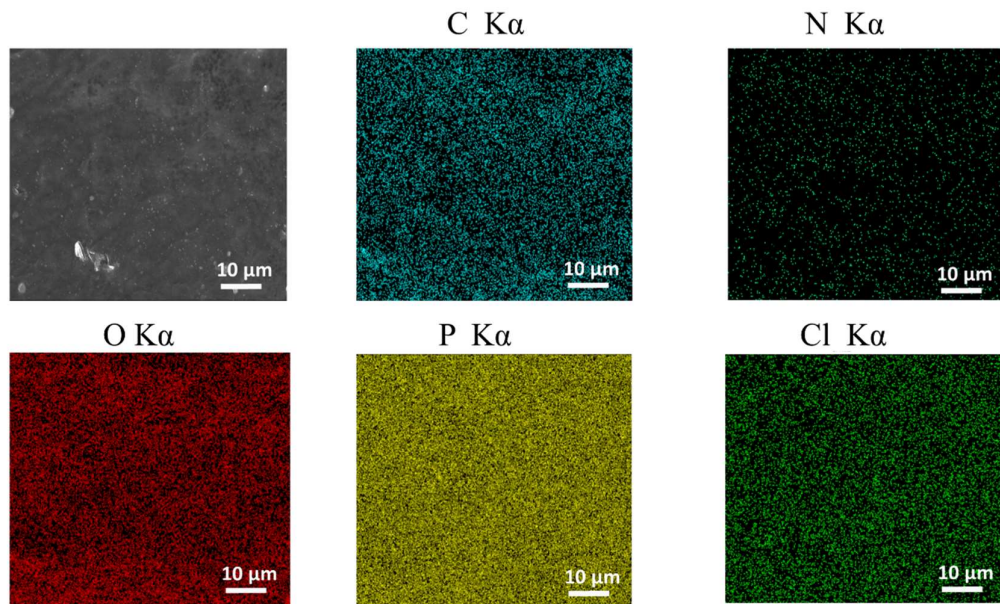

**Fig. S2.** EDS proportion and element images of PVA-E/M<sub>0.4</sub> hydrogel.

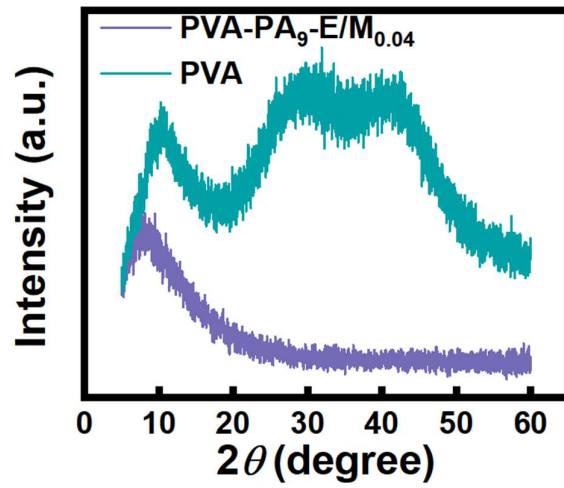

Fig. S3. XRD spectra of the PVA and PVA-PA<sub>9</sub>-E/M<sub>0.4</sub> hydrogel.

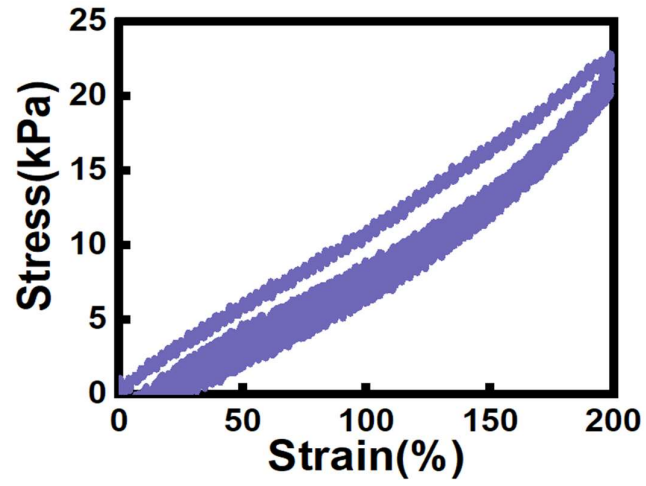

**Fig. S4.** 10 continuous loading-unloading cycles of PVA-PA<sub>9</sub>-E/M<sub>0.4</sub> hydrogel at a strain of 200%.

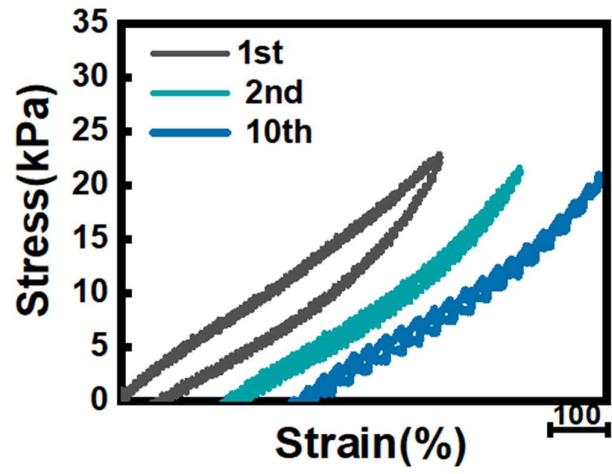

**Fig. S5.** The 1<sup>st</sup>, 2<sup>nd</sup>, and 10<sup>th</sup> loading-unloading cycles of PVA-PA<sub>9</sub>-E/M<sub>0.4</sub> hydrogel at a strain of 200%.

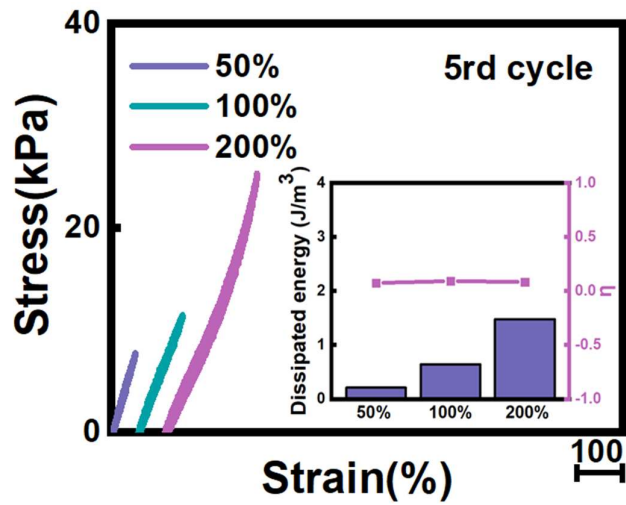

**Fig. S6.** Loading-unloading cycles of PVA-PA<sub>9</sub>-E/M<sub>0.4</sub> hydrogel at different applied strains. The insets correspond to the dissipated energy and mechanical hysteresis of these cycles.



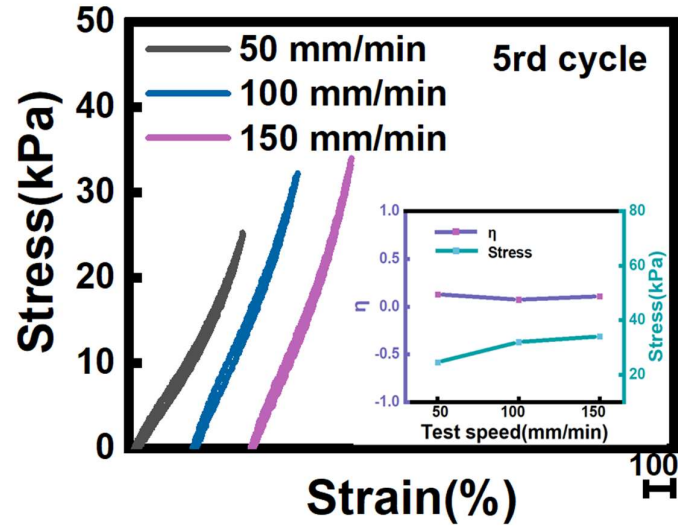

**Fig. S7.** Loading-unloading cycles of PVA-PA<sub>9</sub>-E/M<sub>0.4</sub> hydrogel at different strain speeds. The insets correspond to the fracture stress and mechanical hysteresis of these cycles.

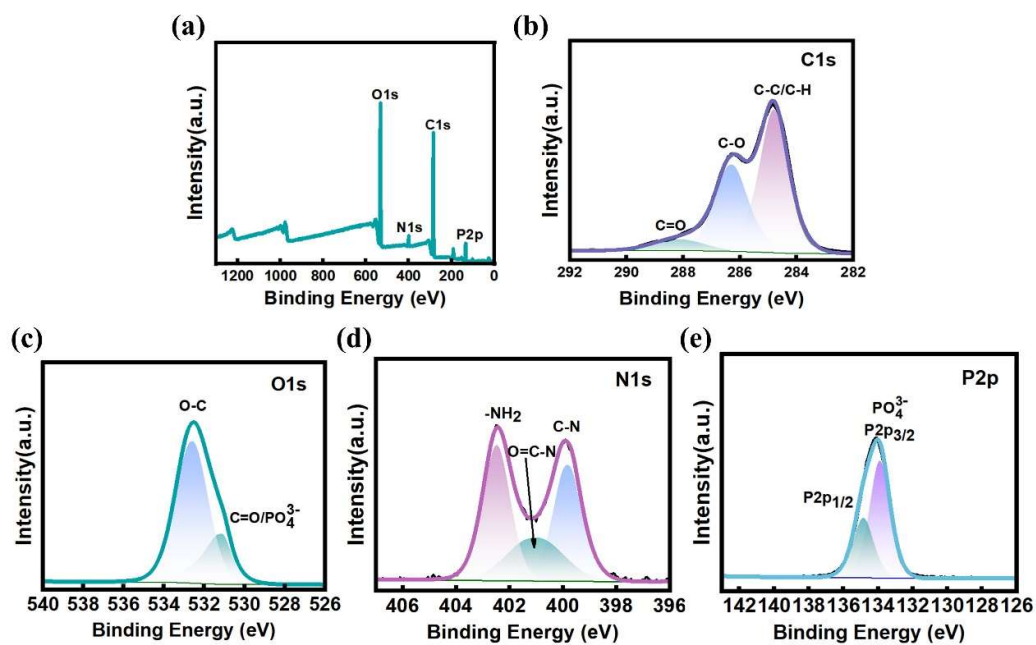

**Fig. S8.** The XPS spectra of PVA-PA<sub>9</sub>-E/M<sub>0.4</sub> hydrogel kept at room temperature. (a)

XPS survey spectra. (b) C 1s scan. (c) O 1s scan. (d) N 1s scan. (e) P 2p scan.

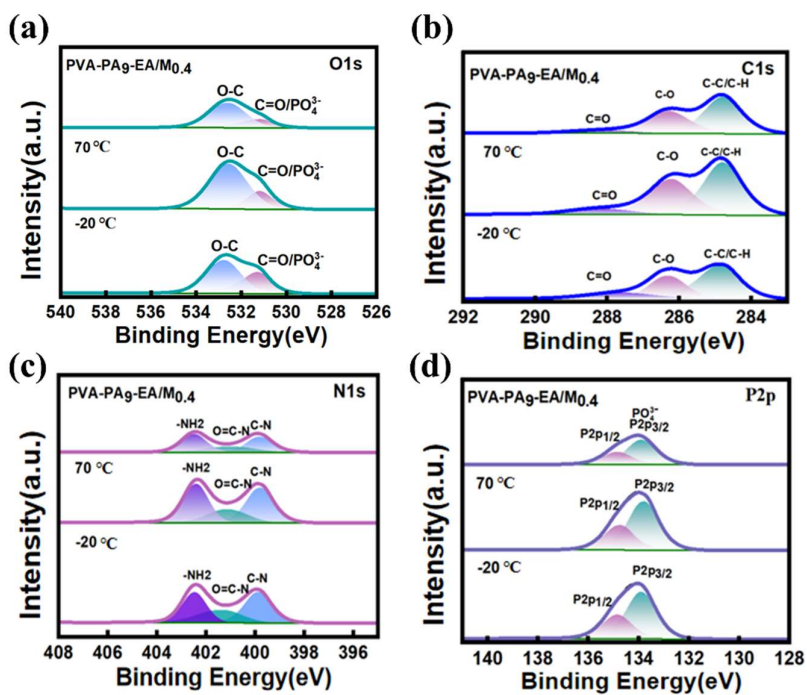

**Fig. S9.** The XPS spectra of PVA-PA<sub>9</sub>-E/M<sub>0.4</sub> hydrogel treated at different temperatures. (a) O 1s scan. (c) C 1s scan. (d) N 1s scan. (e) P 2p scan.

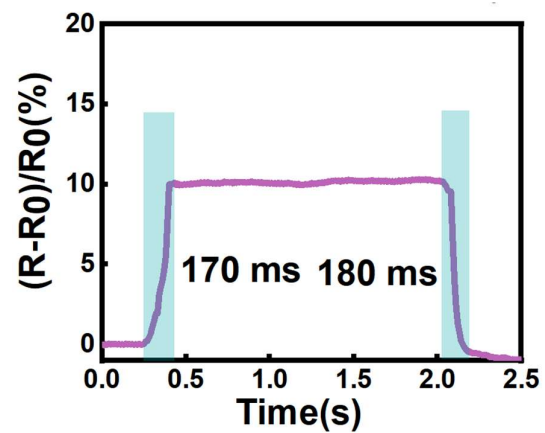

**Fig. S10.** Response and recovery time of the hydrogel sensor under 15% strain.

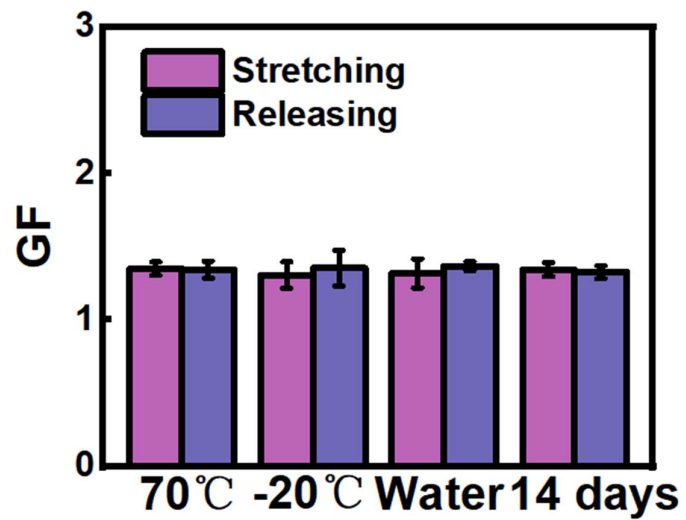

**Fig. S11.** GF of PVA-PA<sub>9</sub>-E/M<sub>0.4</sub> hydrogel-based strain sensor under different environments.

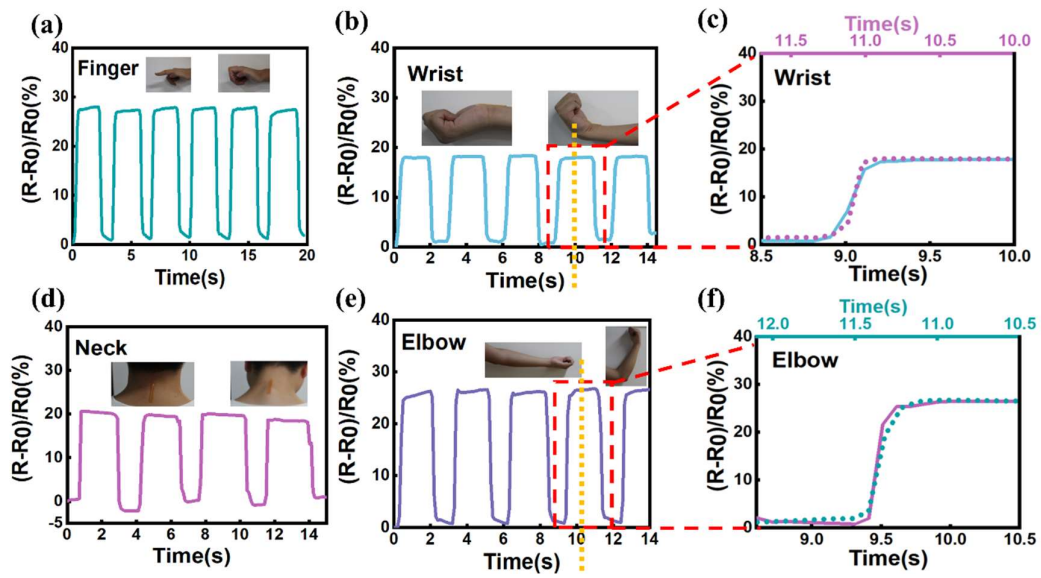

**Fig. S12.** The relative resistance changes of PVA-PA<sub>9</sub>-E/M<sub>0.4</sub> hydrogel-based strain sensor in response to (a) finger, (b) wrist, (d) neck, and (e) elbow bending. The figures displaying the symmetry of the bending and releasing signals in the same cycle of (c) wrist and (f) elbow bending.

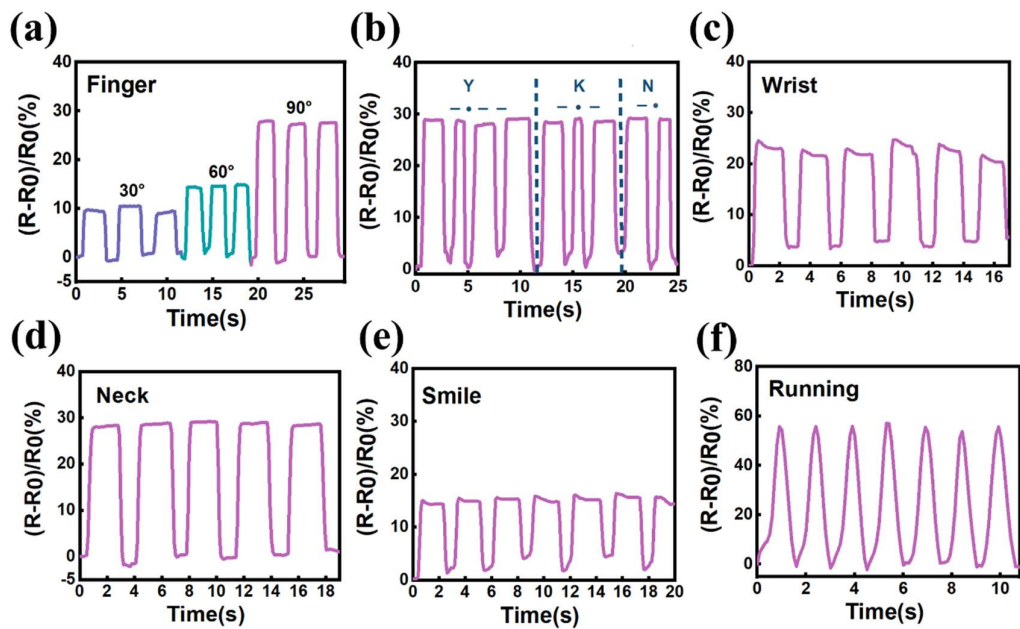

**Fig. S13.** The relative resistance changes of PVA-PA<sub>9</sub>-E/M<sub>0.4</sub> hydrogel-based strain sensor in response to various human motions at 70 °C.

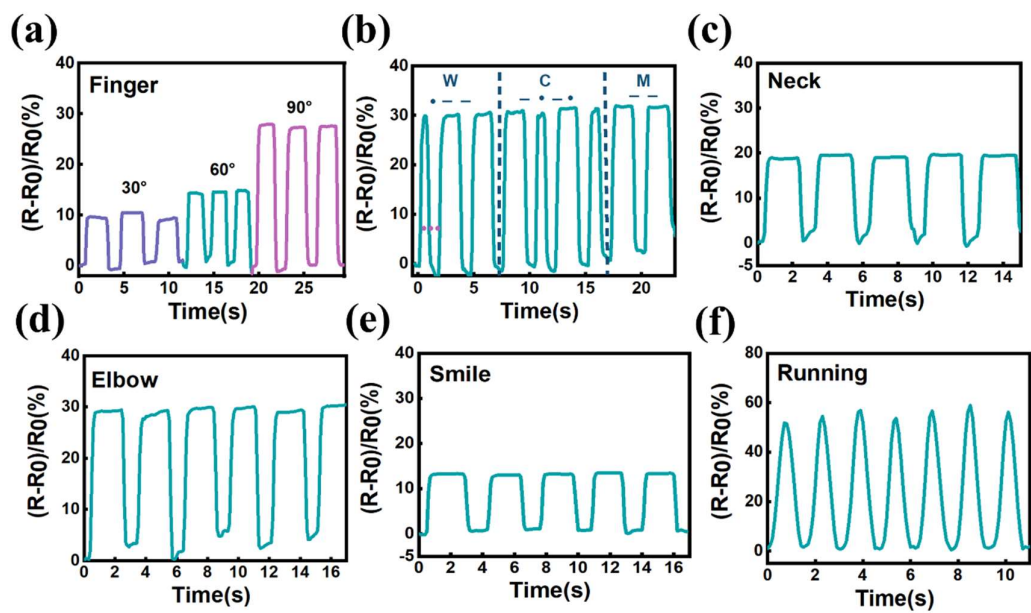

**Fig. S14.** The relative resistance changes of PVA-PA<sub>9</sub>-E/M<sub>0.4</sub> hydrogel-based strain sensor in response to various human motions at -20 °C.



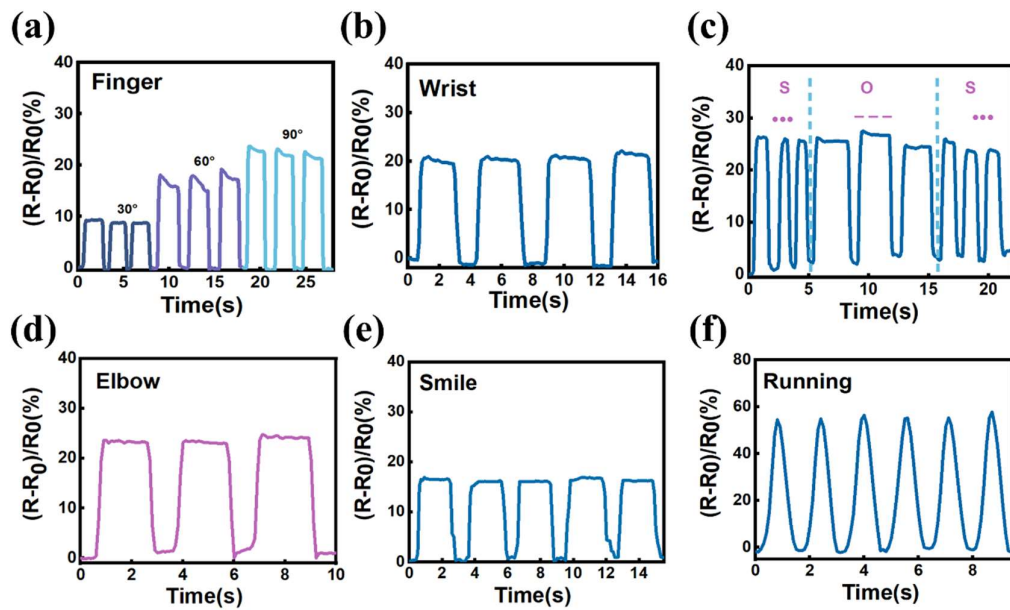

**Fig. S15.** The relative resistance changes of PVA-PA<sub>9</sub>-E/M<sub>0.4</sub> hydrogel-based strain sensor in response to various human motions after water immersion.

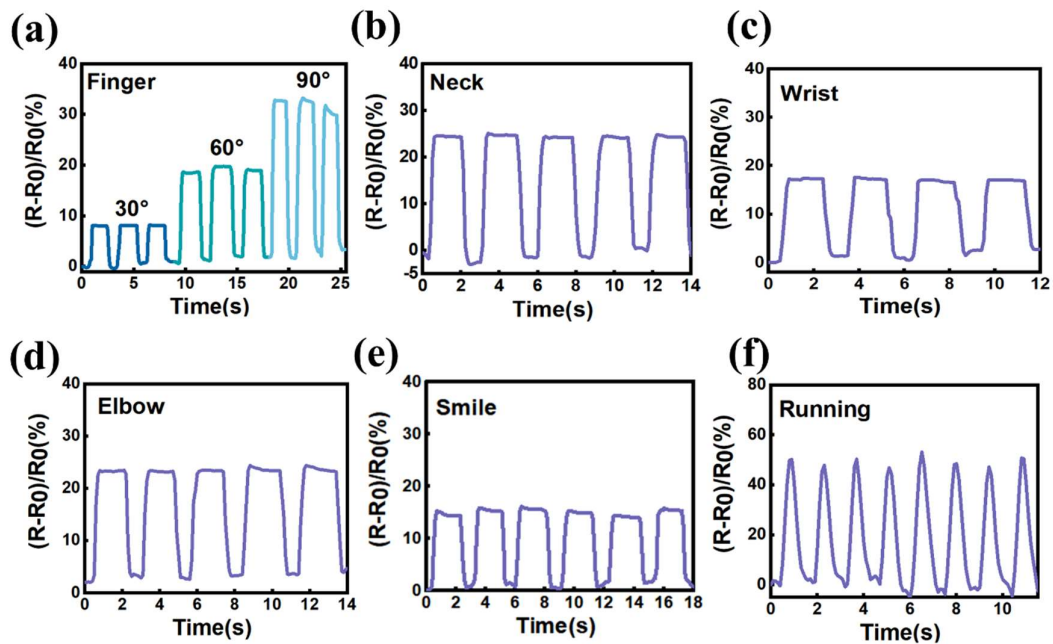

**Fig. S16.** The relative resistance changes of PVA-PA<sub>9</sub>-E/M<sub>0.4</sub> hydrogel-based strain sensor in response to various human motions after 14-day storage.

**Table S2.** Comparison of the strain sensor in this work with other reported hydrogel-based strain sensors.

| Hydrogel                                   | Low hysteresis | Adhesion property (kPa) | Linearity                           | GF        | Environmental stability                                       | Conductivity (S m <sup>-1</sup> ) | Ref       |
|--------------------------------------------|----------------|-------------------------|-------------------------------------|-----------|---------------------------------------------------------------|-----------------------------------|-----------|
| SFRHs                                      | No             | No                      | No                                  | 0.82-2.67 | Yes (under water)                                             | 3.93                              | 1         |
| PVA-CNF                                    | No             | No                      | No                                  | 0.96-1.57 | Yes (50 °C, -50°C, long-term storage)                         | NA                                | 2         |
| CNC/CMC-Na/PVA                             | No             | No                      | No                                  | 1.00-1.40 | Yes (-70 °C)                                                  | 2.1                               | 3         |
| SF/TA@PPy                                  | No             | ~38                     | No                                  | 0.72      | Yes (under water)                                             | 0.034                             | 4         |
| ionogel-NTf <sub>2</sub>                   | No             | ~35                     | No                                  | 0.40-0.69 | No                                                            | 3.5×10 <sup>-3</sup>              | 5         |
| PPHM                                       | No             | 32.7                    | No                                  | 2.05-4.82 | Yes (-20 °C)                                                  | 0.06                              | 4         |
| FG-Ag                                      | No             | 14                      | No                                  | 3.11-4.00 | No                                                            | N.A.                              | 6         |
| CareGum                                    | No             | 144                     | No                                  | 0.50-1.04 | No                                                            | 1.0                               | 7         |
| PVA-CS-PA hydrogels                        | No             | No                      | Yes (0~900%, R <sup>2</sup> =0.996) | 1.31-2.60 | Yes (long-term storage)                                       | 0.48                              | 8         |
| PVA/CNCs @PDA-AuNPs                        | No             | No                      | Yes (0~350%, R <sup>2</sup> =0.998) | 0.99      | No                                                            | ~0.30                             | 9         |
| PAM-TSAS N <sub>2</sub> -LiCl <sub>5</sub> | Yes (~0.1)     | 12                      | No                                  | 1.45-4.50 | No                                                            | 0.4                               | 10        |
| LSN-1.5-Fe/PAM                             | Yes (0.15)     | 11.6                    | Yes (0~100%, R <sup>2</sup> =0.996) | 1.22      | No                                                            | 0.16                              | 11        |
| PVA-PA <sub>9</sub> -E/M <sub>0.04</sub>   | Yes (0.0356)   | 70.95                   | Yes (0~300%, R <sup>2</sup> =0.999) | 1.34      | Yes (70 °C, -20°C, long-term storage, and water environments) | 6.55                              | This work |

\*NA = not available

## Reference

- 1 X. Lu, Y. Si, S. Zhang, J. Yu and B. Ding, *Adv. Funct. Mater.*, 2021, **31**, 1–9.
- 2 X. Chu, R. Wang, H. Zhao, M. Kuang, J. Yan, B. Wang, H. Ma, M. Cui and X. Zhang, *ACS Appl. Mater. Interfaces*, 2022, **14**, 16631–16640.
- 3 H. Wang, Z. Li, M. Zuo, X. Zeng, X. Tang, Y. Sun and L. Lin, *Carbohydr. Polym.*, 2022, **280**, 119018.
- 4 H. Zheng, M. Chen, Y. Sun and B. Zuo, *Chem. Eng. J.*, 2022, **446**, 136931.
- 5 Y. Zhao, D. Gan, L. Wang, S. Wang, W. Wang, Q. Wang, J. Shao and X. Dong, *Adv. Mater. Technol.*, 2023, **8**, 1–10.
- 6 R. Yan, Q. Sun, X. Shi, Z. Sun, S. Tan, B. Tang, W. Chen, F. Liang, H. D. Yu and W. Huang, *Nano Energy*, 2023, **118**, 108932.
- 7 F. B. Kadumudi, M. Hasany, M. K. Pierchala, M. Jahanshahi, N. Taebnia, M. Mehrali, C. F. Mitu, M. A. Shahbazi, T. G. Zsurzsan, A. Knott, T. L. Andresen and A. Dolatshahi-Pirouz, *Adv. Mater.*, 2021, **33**, 1–14.
- 8 C. Liu, R. Zhang, Y. Wang, J. Qu, J. Huang, M. Mo, N. Qing and L. Tang, *J. Mater. Chem. A*, 2023, **11**, 2002–2013.
- 9 P. Li, Z. Ling, X. Liu, L. Bai, W. Wang, H. Chen, H. Yang, L. Yang and D. Wei, *Chem. Eng. J.*, 2023, **466**, 143306.
- 10 S. Han, H. Tan, J. Wei, H. Yuan, S. Li, P. Yang, H. Mi, C. Liu and C. Shen, *Adv. Sci.*, 2023, **10**, 1–12.
- 11 H. Zhao, S. Hao, Q. Fu, X. Zhang, L. Meng, F. Xu and J. Yang, *Chem. Mater.*, 2022, **34**, 5258–5272.
